# Supplementary material
Source: Research Square preprint supplement (doi:10.21203/rs.3.rs-8897604/v1)

## checkCIF/PLATON report

Structure factors have been supplied for datablock(s) 7

THIS REPORT IS FOR GUIDANCE ONLY. IF USED AS PART OF A REVIEW PROCEDURE FOR PUBLICATION, IT SHOULD NOT REPLACE THE EXPERTISE OF AN EXPERIENCED CRYSTALLOGRAPHIC REFEREE.

No syntax errors found.      CIF dictionary      Interpreting this report

### Datablock: 7

---

Bond precision:      S- C = 0.0190 A      Wavelength=0.80241

Cell:                      a=16.6650(12)      b=16.8451(10)      c=18.619(2)  
                                    alpha=92.90(3)      beta=93.90(3)      gamma=119.49(3)

Temperature:      100 K

|                        | Calculated          | Reported            |
|------------------------|---------------------|---------------------|
| Volume                 | 4517.8(16)          | 4517.8(16)          |
| Space group            | P -1                | P -1                |
| Hall group             | -P 1                | -P 1                |
| Moiety formula         | C8 H24 Cl6 O Os2 S4 | C8 H24 Cl6 O Os2 S4 |
| Sum formula            | C8 H24 Cl6 O Os2 S4 | C8 H24 Cl6 O Os2 S4 |
| Mr                     | 857.67              | 857.67              |
| Dx, g cm <sup>-3</sup> | 2.522               | 2.522               |
| Z                      | 8                   | 8                   |
| Mu (mm <sup>-1</sup> ) | 16.756              | 16.756              |
| F000                   | 3184.0              | 3184.0              |
| F000'                  | 3166.99             |                     |
| h, k, lmax             | 21, 21, 24          | 21, 21, 24          |
| Nref                   | 20382               | 20166               |
| Tmin, Tmax             | 0.234, 0.433        | 0.200, 0.400        |
| Tmin'                  | 0.150               |                     |

Correction method= # Reported T Limits: Tmin=0.200 Tmax=0.400  
AbsCorr = MULTI-SCAN

Data completeness= 0.989      Theta(max)= 31.205

R(reflections)= 0.0622( 17200)

wR2(reflections)=  
0.1527( 20166)

S = 1.041

Npar= 800

---

The following ALERTS were generated. Each ALERT has the format  
**test-name\_ALERT\_alert-type\_alert-level**.  
Click on the hyperlinks for more details of the test.

---

 **Alert level A**

PLAT971\_ALERT\_2\_A Check Calcd Resid. Dens. 0.74Ang From Os1 3.69 eA-3

**Author Response: There are the relatively high positive electron density residues near the Os atoms due to the significant absorption effects, which can not be corrected completely.**

PLAT972\_ALERT\_2\_A Check Calcd Resid. Dens. 0.77Ang From Os1 -3.63 eA-3

**Author Response: There are the relatively high negative electron density residues near the Os atoms due to the significant absorption effects, which can not be corrected completely.**

---

 **Alert level B**

PLAT234\_ALERT\_4\_B Large Hirshfeld Difference S3 --C6 . 0.26 Ang.

**Author Response: This is explained by the significant absorption effects, which can not be corrected completely. .**

PLAT971\_ALERT\_2\_B Check Calcd Resid. Dens. 0.61Ang From Os5 3.37 eA-3

**Author Response: There are the relatively high positive electron density residues near the Os atoms due to the significant absorption effects, which can not be corrected completely.**

PLAT971\_ALERT\_2\_B Check Calcd Resid. Dens. 0.85Ang From Os3 3.33 eA-3

**Author Response: There are the relatively high positive electron density residues near the Os atoms due to the significant absorption effects, which can not be corrected completely.**

PLAT971\_ALERT\_2\_B Check Calcd Resid. Dens. 1.01Ang From Os8 2.80 eA-3

**Author Response: There are the relatively high positive electron density residues near the Os atoms due to the significant absorption effects, which can not be corrected completely.**

PLAT971\_ALERT\_2\_B Check Calcd Resid. Dens. 1.34Ang From Os4 2.66 eA-3

**Author Response: There are the relatively high positive electron density residues near the Os atoms due to the significant absorption effects, which can not be corrected completely.**

PLAT971\_ALERT\_2\_B Check Calcd Resid. Dens. 1.31Ang From Os1 2.54 eA-3

**Author Response: There are the relatively high positive electron density residues near the Os atoms due to the significant absorption effects, which can not be corrected completely.**

PLAT972\_ALERT\_2\_B Check Calcd Resid. Dens. 0.77Ang From Os5 -3.27 eA-3

**Author Response: There are the relatively high negative electron density residues near the Os atoms due to the significant absorption effects, which can not be corrected completely.**

PLAT972\_ALERT\_2\_B Check Calcd Resid. Dens. 0.74Ang From Os3 -3.24 eA-3

**Author Response: There are the relatively high negative electron density residues near the Os atoms due to the significant absorption effects, which can not be corrected completely.**

PLAT972\_ALERT\_2\_B Check Calcd Resid. Dens. 0.88Ang From Os1 -3.21 eA-3

**Author Response: There are the relatively high negative electron density residues near the Os atoms due to the significant absorption effects, which can not be corrected completely.**

PLAT972\_ALERT\_2\_B Check Calcd Resid. Dens. 0.81Ang From Os5 -3.20 eA-3

**Author Response: There are the relatively high negative electron density residues near the Os atoms due to the significant absorption effects, which can not be corrected completely.**

PLAT972\_ALERT\_2\_B Check Calcd Resid. Dens. 0.79Ang From Os6 -3.19 eA-3

**Author Response: There are the relatively high negative electron density residues near the Os atoms due to the significant absorption effects, which can not be corrected completely.**

PLAT972\_ALERT\_2\_B Check Calcd Resid. Dens. 0.79Ang From Os4 -3.11 eA-3

**Author Response: There are the relatively high negative electron density residues near the Os atoms due to the significant absorption effects, which can not be corrected completely.**

PLAT972\_ALERT\_2\_B Check Calcd Resid. Dens. 0.84Ang From Os8 -3.09 eA-3

**Author Response: There are the relatively high negative electron density residues near the Os atoms due to the significant absorption effects, which can not be corrected completely.**

PLAT972\_ALERT\_2\_B Check Calcd Resid. Dens. 0.76Ang From Os1 -3.07 eA-3

**Author Response: There are the relatively high negative electron density residues near the Os atoms due to the significant absorption effects, which can not be corrected completely.**

PLAT972\_ALERT\_2\_B Check Calcd Resid. Dens. 0.83Ang From Os5 -3.00 eA-3

**Author Response: There are the relatively high negative electron density residues near the Os atoms due to the significant absorption effects, which can not be corrected completely.**

PLAT972\_ALERT\_2\_B Check Calcd Resid. Dens. 0.76Ang From Os7 -2.95 eA-3

**Author Response: There are the relatively high negative electron density residues near the Os atoms due to the significant absorption effects, which can not be corrected completely.**

PLAT972\_ALERT\_2\_B Check Calcd Resid. Dens. 0.78Ang From Os8 -2.87 eA-3

**Author Response: There are the relatively high negative electron density residues near the Os atoms due to the significant absorption effects, which can not be corrected completely.**

PLAT972\_ALERT\_2\_B Check Calcd Resid. Dens. 0.86Ang From Os3 -2.85 eA-3

**Author Response: There are the relatively high negative electron density residues near the Os atoms due to the significant absorption effects, which can not be corrected completely.**

PLAT972\_ALERT\_2\_B Check Calcd Resid. Dens. 0.80Ang From Os5 -2.84 eA-3

**Author Response: There are the relatively high negative electron density residues near the Os atoms due to the significant absorption effects, which can not be corrected completely.**

PLAT972\_ALERT\_2\_B Check Calcd Resid. Dens. 0.78Ang From Os7 -2.80 eA-3

**Author Response: There are the relatively high negative electron density residues near the Os atoms due to the significant absorption effects, which can not be corrected completely.**

PLAT972\_ALERT\_2\_B Check Calcd Resid. Dens. 0.73Ang From Os7 -2.76 eA-3

**Author Response: There are the relatively high negative electron density residues near the Os atoms due to the significant absorption effects, which can not be corrected completely.**

PLAT972\_ALERT\_2\_B Check Calcd Resid. Dens. 0.80Ang From Os6 -2.62 eA-3

**Author Response: There are the relatively high negative electron density residues near the Os atoms due to the significant absorption effects, which can not be corrected completely.**

PLAT972\_ALERT\_2\_B Check Calcd Resid. Dens. 0.74Ang From Os3 -2.59 eA-3

**Author Response: There are the relatively high negative electron density residues near the Os atoms due to the significant absorption effects, which can not be corrected completely.**

PLAT972\_ALERT\_2\_B Check Calcd Resid. Dens. 0.78Ang From Os2 -2.52 eA-3

**Author Response: There are the relatively high negative electron density residues near the Os atoms due to the significant absorption effects, which can not be corrected completely.**

PLAT972\_ALERT\_2\_B Check Calcd Resid. Dens. 0.70Ang From Os8 -2.51 eA-3

**Author Response: There are the relatively high negative electron density residues near the Os atoms due to the significant absorption effects, which can not be corrected completely.**

---

**Alert level C**

PLAT234\_ALERT\_4\_C Large Hirshfeld Difference S9 --C17 . 0.18 Ang.

**Author Response: This is explained by the significant absorption effects, which can not be corrected completely. .**

PLAT234\_ALERT\_4\_C Large Hirshfeld Difference S9 --C18 . 0.18 Ang.

**Author Response: This is explained by the significant absorption effects, which can not be corrected completely. .**

PLAT242\_ALERT\_2\_C Low 'MainMol' Ueq as Compared to Neighbors of S15 Check  
PLAT242\_ALERT\_2\_C Low 'MainMol' Ueq as Compared to Neighbors of S3 Check  
PLAT242\_ALERT\_2\_C Low 'MainMol' Ueq as Compared to Neighbors of Os6 Check  
PLAT242\_ALERT\_2\_C Low 'MainMol' Ueq as Compared to Neighbors of S11 Check  
PLAT906\_ALERT\_3\_C Large K Value in the Analysis of Variance ..... 2.114 Check  
PLAT911\_ALERT\_3\_C Missing FCF Refl Between Thmin & STh/L= 0.600 56 Report  
2 0 0, -4 2 0, -2 2 0, 0 2 0, 2 2 0, -2 4 0,  
-6 6 0, 10-20 1, -2 -2 1, 0 -2 1, 2 -2 1, -2 0 1,  
2 0 1, 4 0 1, -2 2 1, 0 2 1, 2 4 1, -4 6 1,  
-2 6 1, 10-20 2, 0 0 2, 6 0 2, 0 2 2, 2 2 2,  
-2 -2 3, 2 2 3, 6-18 4, -2-12 4, 0 -2 4, 0 0 4,  
-3 -9 5, 0 -3 5, 0 -2 5, -2 0 5, 2 2 5, 0 -8 6,  
6 -6 6, -2-16 7, -1-14 7, -6-12 7, 2 2 7, -7-12 8,  
-5-11 8, 5-18 9, 5-17 9, -3-13 9, -10 -1 9, 2 2 9,  
7-18 10, 0-16 11, 1-10 15, 12 -5 16, -1 -8 17, -2 2 17,  
0 0 18, 2 2 18,  
PLAT913\_ALERT\_3\_C Missing # of Very Strong Reflections in FCF .... 7 Note  
2 -2 1, 2 0 1, 0 2 1, 6 0 2, 0 0 4, 0 -2 5,  
-2 0 5,  
PLAT971\_ALERT\_2\_C Check Calcd Resid. Dens. 1.33Ang From Os6 2.47 eA-3

**Author Response: There are the relatively high positive electron density residues near the Os atoms due to the significant absorption effects, which can not be corrected completely.**

PLAT971\_ALERT\_2\_C Check Calcd Resid. Dens. 1.26Ang From Cl12 2.38 eA-3

**Author Response: There are the relatively high positive electron density residues near the Os atoms due to the significant absorption effects, which can not be corrected completely.**

PLAT971\_ALERT\_2\_C Check Calcd Resid. Dens. 1.31Ang From Os6 2.34 eA-3

**Author Response: There are the relatively high positive electron density residues near the Os atoms due to the significant absorption effects, which can not be corrected completely.**

PLAT971\_ALERT\_2\_C Check Calcd Resid. Dens. 0.52Ang From S16A 2.29 eA-3

**Author Response: There are the relatively high positive electron density residues near the Os atoms due to the significant absorption effects, which can not be corrected completely.**

PLAT971\_ALERT\_2\_C Check Calcd Resid. Dens. 1.34Ang From Os5 2.25 eA-3

**Author Response: There are the relatively high positive electron density residues near the Os atoms due to the significant absorption effects, which can not be corrected completely.**

PLAT971\_ALERT\_2\_C Check Calcd Resid. Dens. 1.36Ang From Os1 2.24 eA-3

**Author Response: There are the relatively high positive electron density residues near the Os atoms due to the significant absorption effects, which can not be corrected completely.**

PLAT971\_ALERT\_2\_C Check Calcd Resid. Dens. 1.27Ang From Os2 2.21 eA-3

**Author Response: There are the relatively high positive electron density residues near the Os atoms due to the significant absorption effects, which can not be corrected completely.**

PLAT971\_ALERT\_2\_C Check Calcd Resid. Dens. 1.38Ang From Os7 2.16 eA-3

**Author Response: There are the relatively high positive electron density residues near the Os atoms due to the significant absorption effects, which can not be corrected completely.**

PLAT971\_ALERT\_2\_C Check Calcd Resid. Dens. 1.31Ang From Os5 2.14 eA-3

**Author Response: There are the relatively high positive electron density residues near the Os atoms due to the significant absorption effects, which can not be corrected completely.**

PLAT971\_ALERT\_2\_C Check Calcd Resid. Dens. 1.43Ang From Cl4 2.06 eA-3

**Author Response: There are the relatively high positive electron density residues near the Os atoms due to the significant absorption effects, which can not be corrected completely.**

PLAT971\_ALERT\_2\_C Check Calcd Resid. Dens. 1.27Ang From Os7 1.97 eA-3

**Author Response: There are the relatively high positive electron density residues near the Os atoms due to the significant absorption effects, which can not be corrected completely.**

PLAT971\_ALERT\_2\_C Check Calcd Resid. Dens. 1.28Ang From Os3 1.90 eA-3

**Author Response: There are the relatively high positive electron density residues near the Os atoms due to the significant absorption effects, which can not be corrected completely.**

PLAT971\_ALERT\_2\_C Check Calcd Resid. Dens. 0.75Ang From Os4 1.87 eA-3

**Author Response: There are the relatively high positive electron density residues near the Os atoms due to the significant absorption effects, which can not be corrected completely.**

PLAT971\_ALERT\_2\_C Check Calcd Resid. Dens. 0.65Ang From Os5 1.86 eA-3

**Author Response: There are the relatively high positive electron density residues near the Os atoms due to the significant absorption effects, which can not be corrected completely.**

PLAT971\_ALERT\_2\_C Check Calcd Resid. Dens. 1.90Ang From S3 1.86 eA-3

**Author Response: There are the relatively high positive electron density residues near the Os atoms due to the significant absorption effects, which can not be corrected completely.**

PLAT971\_ALERT\_2\_C Check Calcd Resid. Dens. 1.25Ang From Os8 1.85 eA-3

**Author Response: There are the relatively high positive electron density residues near the Os atoms due to the significant absorption effects, which can not be corrected completely.**

PLAT971\_ALERT\_2\_C Check Calcd Resid. Dens. 1.36Ang From Cl9 1.80 eA-3

**Author Response: There are the relatively high positive electron density residues near the Os atoms due to the significant absorption effects, which can not be corrected completely.**

PLAT971\_ALERT\_2\_C Check Calcd Resid. Dens. 0.51Ang From Os2 1.79 eA-3

**Author Response: There are the relatively high positive electron density residues near the Os atoms due to the significant absorption effects, which can not be corrected completely.**

PLAT971\_ALERT\_2\_C Check Calcd Resid. Dens. 0.99Ang From Os8 1.78 eA-3

**Author Response: There are the relatively high positive electron density residues near the Os atoms due to the significant absorption effects, which can not be corrected completely.**

PLAT972\_ALERT\_2\_C Check Calcd Resid. Dens. 0.81Ang From Os2 -2.45 eA-3

**Author Response: There are the relatively high negative electron density residues near the Os atoms due to the significant absorption effects, which can not be corrected completely.**

PLAT972\_ALERT\_2\_C Check Calcd Resid. Dens. 0.78Ang From Os2 -2.40 eA-3

**Author Response: There are the relatively high negative electron density residues near the Os atoms due to the significant absorption effects, which can not be corrected completely.**

PLAT972\_ALERT\_2\_C Check Calcd Resid. Dens. 0.92Ang From Os8 -2.33 eA-3

**Author Response: There are the relatively high negative electron density residues near the Os atoms due to the significant absorption effects, which can not be corrected completely.**

PLAT972\_ALERT\_2\_C Check Calcd Resid. Dens. 0.81Ang From Os4 -2.30 eA-3

**Author Response: There are the relatively high negative electron density residues near the Os atoms due to the significant absorption effects, which can not be corrected completely.**

PLAT972\_ALERT\_2\_C Check Calcd Resid. Dens. 0.87Ang From Os1 -2.27 eA-3

**Author Response: There are the relatively high negative electron density residues near the Os atoms due to the significant absorption effects, which can not be corrected completely.**

|                   |                                           |   |            |
|-------------------|-------------------------------------------|---|------------|
| PLAT977_ALERT_2_C | Check Negative Difference Density on H5B  | . | -0.34 eA-3 |
| PLAT977_ALERT_2_C | Check Negative Difference Density on H6A  | . | -0.46 eA-3 |
| PLAT977_ALERT_2_C | Check Negative Difference Density on H6C  | . | -0.37 eA-3 |
| PLAT977_ALERT_2_C | Check Negative Difference Density on H21A | . | -0.43 eA-3 |
| PLAT977_ALERT_2_C | Check Negative Difference Density on H24A | . | -0.35 eA-3 |
| PLAT977_ALERT_2_C | Check Negative Difference Density on H26B | . | -0.32 eA-3 |
| PLAT977_ALERT_2_C | Check Negative Difference Density on H28B | . | -0.35 eA-3 |
| PLAT977_ALERT_2_C | Check Negative Difference Density on H32D | . | -0.44 eA-3 |
| PLAT977_ALERT_2_C | Check Negative Difference Density on H26E | . | -0.31 eA-3 |

### Alert level G

|                   |                                                                                    |                |              |
|-------------------|------------------------------------------------------------------------------------|----------------|--------------|
| ABSMU01_ALERT_1_G | Calculation of _exptl_absorpt_correction_mu not performed for this radiation type. |                |              |
| PLAT002_ALERT_2_G | Number of Distance or Angle Restraints on AtSite                                   |                | 14 Note      |
| PLAT083_ALERT_2_G | SHELXL Second Parameter in WGHT Unusually Large                                    |                | 120.00 Why ? |
| PLAT092_ALERT_4_G | Check: Wavelength Given is not Cu,Ga,Mo,Ag,In Ka                                   |                | 0.80241 Ang. |
| PLAT112_ALERT_2_G | ADDSYM Detects New (Pseudo) Symm. Elem                                             | c              | 94 %Fit      |
| PLAT113_ALERT_2_G | ADDSYM Suggests Possible Pseudo/New Space Group                                    |                | C2/c Check   |
|                   | WARNING: Disordered Atoms Excluded from Analysis                                   |                |              |
|                   | Check Model Parameter Symmetry for Reflection Data Support                         |                |              |
| PLAT154_ALERT_1_G | The s.u.'s on the Cell Angles are Equal ..(Note)                                   |                | 0.03 Degree  |
| PLAT171_ALERT_4_G | The CIF-Embedded .res File Contains EADP Records                                   |                | 4 Report     |
| PLAT172_ALERT_4_G | The CIF-Embedded .res File Contains DFIX Records                                   |                | 3 Report     |
| PLAT180_ALERT_4_G | Check Cell Rounding: # of Values Ending with 0 =                                   |                | 3 Note       |
| PLAT232_ALERT_2_G | Hirshfeld Test Diff (M-X) Os5                                                      | --O3 .         | 5.2 s.u.     |
| PLAT232_ALERT_2_G | Hirshfeld Test Diff (M-X) Os6                                                      | --O3 .         | 5.5 s.u.     |
| PLAT300_ALERT_4_G | Atom Site Occupancy of S13A                                                        | Constrained at | 0.7 Check    |
| PLAT300_ALERT_4_G | Atom Site Occupancy of S16A                                                        | Constrained at | 0.5 Check    |
| PLAT300_ALERT_4_G | Atom Site Occupancy of S16B                                                        | Constrained at | 0.5 Check    |
| PLAT300_ALERT_4_G | Atom Site Occupancy of S13B                                                        | Constrained at | 0.3 Check    |
| PLAT300_ALERT_4_G | Atom Site Occupancy of C25A                                                        | Constrained at | 0.7 Check    |
| PLAT300_ALERT_4_G | Atom Site Occupancy of C26A                                                        | Constrained at | 0.7 Check    |
| PLAT300_ALERT_4_G | Atom Site Occupancy of C31A                                                        | Constrained at | 0.5 Check    |
| PLAT300_ALERT_4_G | Atom Site Occupancy of C31B                                                        | Constrained at | 0.5 Check    |
| PLAT300_ALERT_4_G | Atom Site Occupancy of C32A                                                        | Constrained at | 0.5 Check    |
| PLAT300_ALERT_4_G | Atom Site Occupancy of C32B                                                        | Constrained at | 0.5 Check    |
| PLAT300_ALERT_4_G | Atom Site Occupancy of C25B                                                        | Constrained at | 0.3 Check    |
| PLAT300_ALERT_4_G | Atom Site Occupancy of C26B                                                        | Constrained at | 0.3 Check    |
| PLAT300_ALERT_4_G | Atom Site Occupancy of H25A                                                        | Constrained at | 0.7 Check    |
| PLAT300_ALERT_4_G | Atom Site Occupancy of H25B                                                        | Constrained at | 0.7 Check    |
| PLAT300_ALERT_4_G | Atom Site Occupancy of H25C                                                        | Constrained at | 0.7 Check    |
| PLAT300_ALERT_4_G | Atom Site Occupancy of H26A                                                        | Constrained at | 0.7 Check    |
| PLAT300_ALERT_4_G | Atom Site Occupancy of H26B                                                        | Constrained at | 0.7 Check    |
| PLAT300_ALERT_4_G | Atom Site Occupancy of H26C                                                        | Constrained at | 0.7 Check    |
| PLAT300_ALERT_4_G | Atom Site Occupancy of H31A                                                        | Constrained at | 0.5 Check    |
| PLAT300_ALERT_4_G | Atom Site Occupancy of H31B                                                        | Constrained at | 0.5 Check    |
| PLAT300_ALERT_4_G | Atom Site Occupancy of H31C                                                        | Constrained at | 0.5 Check    |
| PLAT300_ALERT_4_G | Atom Site Occupancy of H31D                                                        | Constrained at | 0.5 Check    |
| PLAT300_ALERT_4_G | Atom Site Occupancy of H31E                                                        | Constrained at | 0.5 Check    |
| PLAT300_ALERT_4_G | Atom Site Occupancy of H31F                                                        | Constrained at | 0.5 Check    |

|                   |                                                  |                |                 |              |
|-------------------|--------------------------------------------------|----------------|-----------------|--------------|
| PLAT300_ALERT_4_G | Atom Site Occupancy of H32A                      | Constrained at | 0.5             | Check        |
| PLAT300_ALERT_4_G | Atom Site Occupancy of H32B                      | Constrained at | 0.5             | Check        |
| PLAT300_ALERT_4_G | Atom Site Occupancy of H32C                      | Constrained at | 0.5             | Check        |
| PLAT300_ALERT_4_G | Atom Site Occupancy of H32D                      | Constrained at | 0.5             | Check        |
| PLAT300_ALERT_4_G | Atom Site Occupancy of H32E                      | Constrained at | 0.5             | Check        |
| PLAT300_ALERT_4_G | Atom Site Occupancy of H32F                      | Constrained at | 0.5             | Check        |
| PLAT300_ALERT_4_G | Atom Site Occupancy of H25D                      | Constrained at | 0.3             | Check        |
| PLAT300_ALERT_4_G | Atom Site Occupancy of H25E                      | Constrained at | 0.3             | Check        |
| PLAT300_ALERT_4_G | Atom Site Occupancy of H25F                      | Constrained at | 0.3             | Check        |
| PLAT300_ALERT_4_G | Atom Site Occupancy of H26D                      | Constrained at | 0.3             | Check        |
| PLAT300_ALERT_4_G | Atom Site Occupancy of H26E                      | Constrained at | 0.3             | Check        |
| PLAT300_ALERT_4_G | Atom Site Occupancy of H26F                      | Constrained at | 0.3             | Check        |
| PLAT301_ALERT_3_G | Main Residue Disorder .....                      | (Resd 1)       | 29%             | Note         |
| PLAT413_ALERT_2_G | Short Inter XH3 .. XHn                           | H14B ..H25F    | .               | 2.06 Ang.    |
|                   |                                                  | x,y,z =        | 1_555           | Check        |
| PLAT794_ALERT_5_G | Tentative Bond Valency for Os1                   | (IV)           | .               | 4.23 Info    |
| PLAT794_ALERT_5_G | Tentative Bond Valency for Os2                   | (IV)           | .               | 4.16 Info    |
| PLAT794_ALERT_5_G | Tentative Bond Valency for Os3                   | (IV)           | .               | 4.11 Info    |
| PLAT794_ALERT_5_G | Tentative Bond Valency for Os4                   | (IV)           | .               | 4.21 Info    |
| PLAT794_ALERT_5_G | Tentative Bond Valency for Os5                   | (IV)           | .               | 4.20 Info    |
| PLAT794_ALERT_5_G | Tentative Bond Valency for Os6                   | (IV)           | .               | 4.21 Info    |
| PLAT860_ALERT_3_G | Number of Least-Squares Restraints .....         |                | 12              | Note         |
| PLAT912_ALERT_4_G | Missing # of FCF Reflections Above STh/L=        | 0.600          | 157             | Note         |
| PLAT933_ALERT_2_G | Number of HKL-OMIT Records in Embedded .res File |                | 15              | Note         |
|                   | 2 2 5, -2 -2 1, 2 2 3, -2 -2 3, 0 0 2,           | 0 -2 4,        |                 |              |
|                   | 2 2 7, 0 14 12, -6 -4 21, -10 -1 9, -2 -9 21,    | 0 -8 6,        |                 |              |
|                   | -2 2 17, 2 2 18, 0 0 18,                         |                |                 |              |
| PLAT941_ALERT_3_G | Average HKL Measurement Multiplicity .....       |                | 4.1             | Low          |
| PLAT965_ALERT_2_G | The SHELXL WEIGHT Optimisation has not Converged |                |                 | Please Check |
| PLAT969_ALERT_5_G | The 'Henn et al.' R-Factor-gap value .....       |                | 2.45            | Note         |
|                   | Predicted wR2: Based on SigI**2                  | 6.24           | or SHELX Weight | 14.97        |

---

2 **ALERT level A** = Most likely a serious problem - resolve or explain  
 25 **ALERT level B** = A potentially serious problem, consider carefully  
 42 **ALERT level C** = Check. Ensure it is not caused by an omission or oversight  
 62 **ALERT level G** = General information/check it is not something unexpected

2 ALERT type 1 CIF construction/syntax error, inconsistent or missing data  
 72 ALERT type 2 Indicator that the structure model may be wrong or deficient  
 6 ALERT type 3 Indicator that the structure quality may be low  
 44 ALERT type 4 Improvement, methodology, query or suggestion  
 7 ALERT type 5 Informative message, check

---

It is advisable to attempt to resolve as many as possible of the alerts in all categories. Often the minor alerts point to easily fixed oversights, errors and omissions in your CIF or refinement strategy, so attention to these fine details can be worthwhile. In order to resolve some of the more serious problems it may be necessary to carry out additional measurements or structure refinements. However, the purpose of your study may justify the reported deviations and the more serious of these should normally be commented upon in the discussion or experimental section of a paper or in the "special\_details" fields of the CIF. checkCIF was carefully designed to identify outliers and unusual parameters, but every test has its limitations and alerts that are not important in a particular case may appear. Conversely, the absence of alerts does not guarantee there are no aspects of the results needing attention. It is up to the individual to critically assess their own results and, if necessary, seek expert advice.

### **Publication of your CIF in IUCr journals**

A basic structural check has been run on your CIF. These basic checks will be run on all CIFs submitted for publication in IUCr journals (*Acta Crystallographica*, *Journal of Applied Crystallography*, *Journal of Synchrotron Radiation*); however, if you intend to submit to *Acta Crystallographica Section C* or *E* or *IUCrData*, you should make sure that full publication checks are run on the final version of your CIF prior to submission.

### **Publication of your CIF in other journals**

Please refer to the *Notes for Authors* of the relevant journal for any special instructions relating to CIF submission.

---

**PLATON version of 06/01/2024; check.def file version of 05/01/2024**

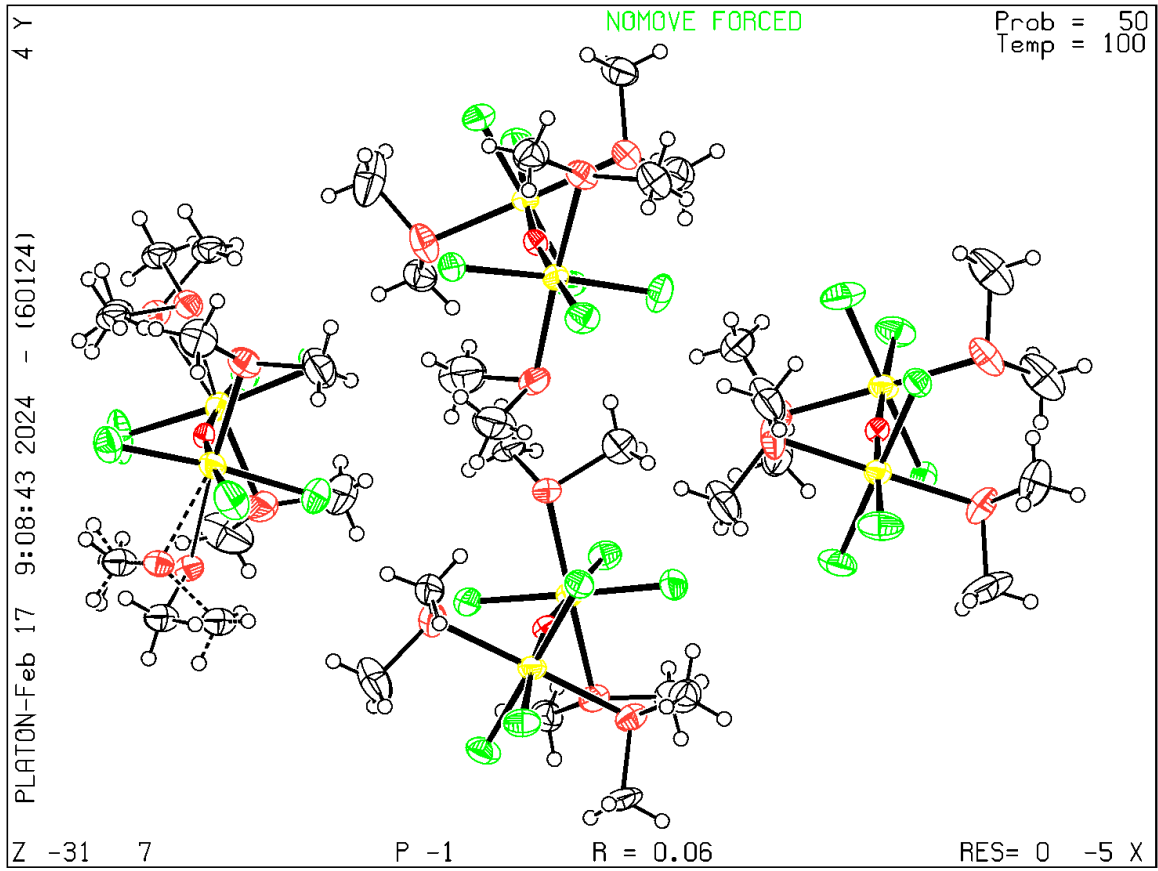

Supplement: Supplementary file 5 [file 8a7e42878f7aae544f4c732e.pdf]
