# Supplementary material
Source: Research Square preprint supplement (doi:10.21203/rs.3.rs-8897604/v1)

---

The following ALERTS were generated. Each ALERT has the format

**test-name\_ALERT\_alert-type\_alert-level.**

Click on the hyperlinks for more details of the test.

---

 **Alert level B**

PLAT971\_ALERT\_2\_B Check Calcd Resid. Dens. 1.22Ang From Os1

3.09 eA-3

**Author Response: There is the relatively high positive electron density residue near the Os atom due to the significant absorption effects, which can not be corrected completely.**

---

 **Alert level C**

PLAT094\_ALERT\_2\_C Ratio of Maximum / Minimum Residual Density .... 2.69 Report

PLAT911\_ALERT\_3\_C Missing FCF Refl Between Thmin & STh/L= 0.600 8 Report

2 0 0, 2 1 0, 9 3 1, 11 2 1, 1 0 2, 1 1 2,  
6 0 2, 10 2 4,

---

 **Alert level G**

PLAT019\_ALERT\_1\_G \_diffn\_measured\_fraction\_theta\_full/\*\_max < 1.0 0.998 Report

PLAT232\_ALERT\_2\_G Hirshfeld Test Diff (M-X) Os1 --Cl1 . 11.0 s.u.

PLAT232\_ALERT\_2\_G Hirshfeld Test Diff (M-X) Os1 --Cl2 . 6.7 s.u.

PLAT232\_ALERT\_2\_G Hirshfeld Test Diff (M-X) Os1 --S1 . 6.3 s.u.

PLAT794\_ALERT\_5\_G Tentative Bond Valency for Os1 (IV) . 3.99 Info

PLAT912\_ALERT\_4\_G Missing # of FCF Reflections Above STh/L= 0.600 2 Note

PLAT913\_ALERT\_3\_G Missing # of Very Strong Reflections in FCF .... 1 Note

2 0 0,

PLAT933\_ALERT\_2\_G Number of HKL-OMIT Records in Embedded .res File 9 Note

2 1 0, 1 1 2, 1 0 2, 9 3 1, 6 0 2, 11 2 1,

2 0 0, 10 2 4, 12 2 7,

PLAT969\_ALERT\_5\_G The 'Henn et al.' R-Factor-gap value ..... 1.77 Note

Predicted wR2: Based on SigI\*\*2 3.81 or SHELX Weight 6.35

---

0 **ALERT level A** = Most likely a serious problem - resolve or explain

1 **ALERT level B** = A potentially serious problem, consider carefully

2 **ALERT level C** = Check. Ensure it is not caused by an omission or oversight

9 **ALERT level G** = General information/check it is not something unexpected

1 ALERT type 1 CIF construction/syntax error, inconsistent or missing data

6 ALERT type 2 Indicator that the structure model may be wrong or deficient

2 ALERT type 3 Indicator that the structure quality may be low

1 ALERT type 4 Improvement, methodology, query or suggestion

2 ALERT type 5 Informative message, check

---

---

It is advisable to attempt to resolve as many as possible of the alerts in all categories. Often the minor alerts point to easily fixed oversights, errors and omissions in your CIF or refinement strategy, so attention to these fine details can be worthwhile. In order to resolve some of the more serious problems it may be necessary to carry out additional measurements or structure refinements. However, the purpose of your study may justify the reported deviations and the more serious of these should normally be commented upon in the discussion or experimental section of a paper or in the "special\_details" fields of the CIF. checkCIF was carefully designed to identify outliers and unusual parameters, but every test has its limitations and alerts that are not important in a particular case may appear. Conversely, the absence of alerts does not guarantee there are no aspects of the results needing attention. It is up to the individual to critically assess their own results and, if necessary, seek expert advice.

### **Publication of your CIF in IUCr journals**

A basic structural check has been run on your CIF. These basic checks will be run on all CIFs submitted for publication in IUCr journals (*Acta Crystallographica*, *Journal of Applied Crystallography*, *Journal of Synchrotron Radiation*); however, if you intend to submit to *Acta Crystallographica Section C* or *E* or *IUCrData*, you should make sure that full publication checks are run on the final version of your CIF prior to submission.

### **Publication of your CIF in other journals**

Please refer to the *Notes for Authors* of the relevant journal for any special instructions relating to CIF submission.

---

**PLATON version of 06/01/2024; check.def file version of 05/01/2024**

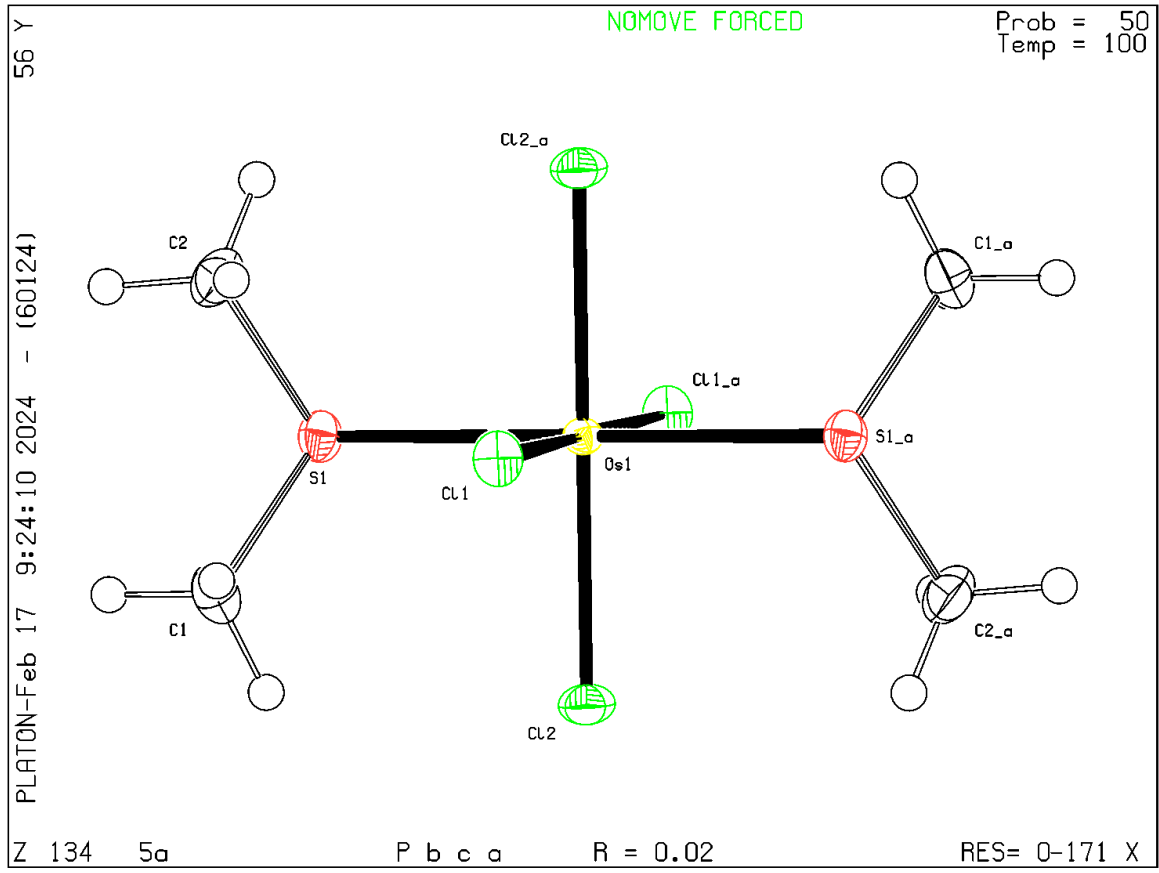

Supplement: Supplementary file 1 [file 04148a8af8fcfd0700ac64ba.pdf]
