# Supplementary material
Source: Research Square preprint supplement (doi:10.21203/rs.3.rs-8897604/v1)
Supplement: Supplementary file 2 [file 19440f3a3079b3570aa29e2e.docx]

Supplementary Material

**Synthesis and Structure of the Dimethyl Sulfide Complexes [OsX4(dms)2]
(Х = Cl, Br) and [Os2OCl6(dms)4]**

*Olga V. Rudnitskayaa*, Ekaterina V. Dobrokhotovaa, Tatiana A. Tereshinaa, Ekaterina K. Kultyshkinaa, Daniil S. Pshenichnyya, Elena A. Fortalnovaa, Ivan V. Anan'evb,c, Ilya A. Yakushevb, Victor N.Khrustaleva,d**

*a* *Peoples’ Friendship University of Russia (RUDN University),6 Miklukho-Maklay St, 117198 Moscow, Russian Federation;*

*b**N.S. Kurnakov Institute of General and Inorganic Chemistry RAS, Leninsky prospect, 31, 119991 Moscow, Russian Federation;*

*c A. N. Nesmeyanov Institute of Organoelement compounds RAS, Vavilova St., 28, bld. 1., 119334, Moscow, Russian Federation;*

*d Zelinsky Institute of Organic Chemistry RAS,Leninsky prospect, 47, 119991 Moscow, Russian Federation*

** Corresponding authors,: E-mail:* [*orudnitskaya@rambler.ru*](mailto:orudnitskaya@rambler.ru); [*vnkhrustalev@gmail.com*](mailto:vnkhrustalev@gmail.com)

**Figure Captions**

**Fig. S1.** UV-Vis absorption spectra of chromatographic fractions of thermolysis products of complexes **1** at 140 °C, τ = 1 h (a), 3 at 140 °C, τ = 4 h (b), 4 at 100 °C, τ = 4 h (c).

**Fig. S2.** DTA/TG results of [H(dmso)2]2[OsХ6], where Х = Cl, Br: DTA and Temperature curves vs. time (a); temperature dependences of TG curves (b).

**Fig. S3.** DTA/TG results of [H(dmso)2][OsХ5(dmso)], where Х = Cl, Br: time dependences of DTA and Temperature curves (a); TG curves vs. time (b).

**Fig. S4.** X-ray diffraction patterns of [OsCl4(dms)2]: experimental diffraction pattern of [OsCl4(dms)2] powder (1); simulated for a single crystal with space group *P*bca (2) and space group *P*21/n (3).

**Fig. S5.** The staggered and eclipsed conformers of molecules **5** and **6** according to DFT calculations. The relative energies of the conformers (kJ/mol) are given in brackets.


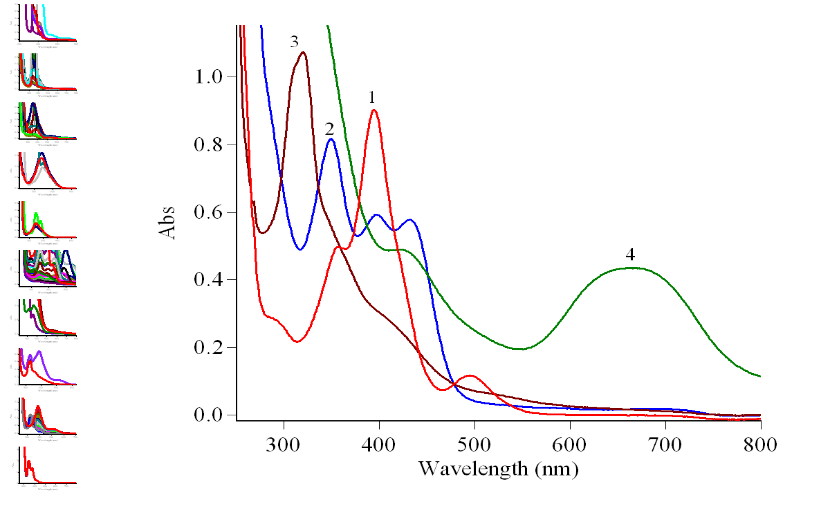


А

λ, nm

a


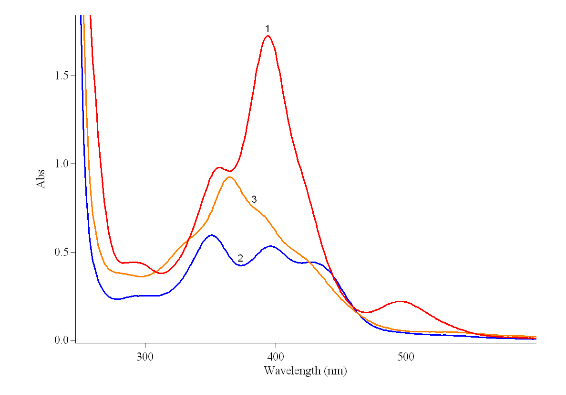


b

λ, nm

А


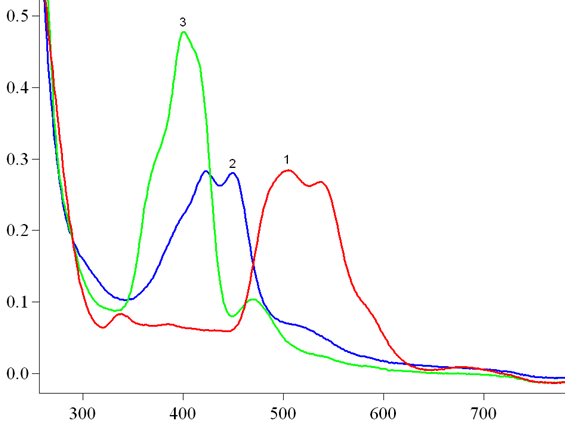


c

λ, nm

А

**Fig. S1.** UV-vis absorption spectra of chromatographic fractions of thermolysis products of complexes **1** at 140 °C, τ = 1 h (a), **3** at 140 °C, τ = 4 h (b), **4** at 100 °C, τ = 4 h (c).


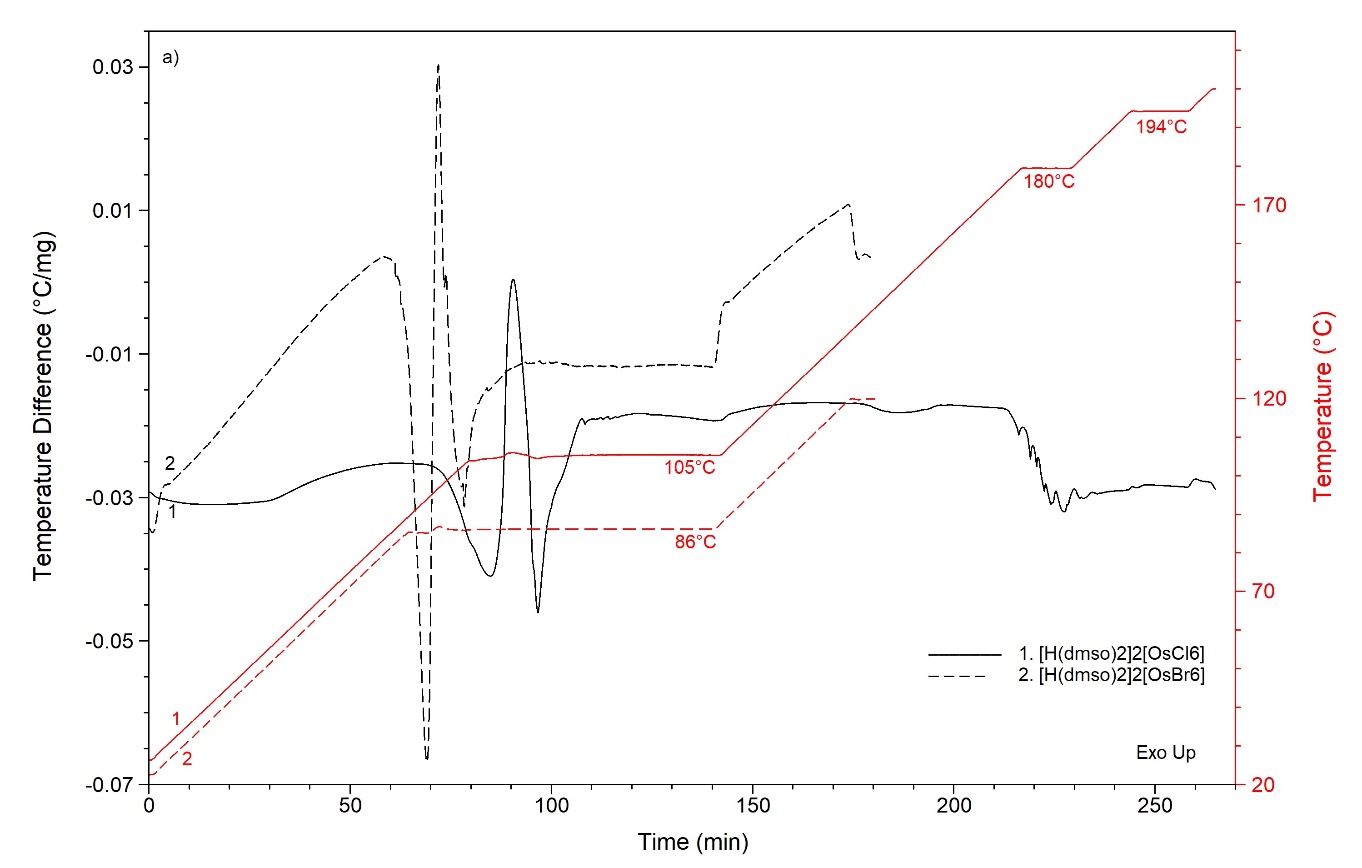


a


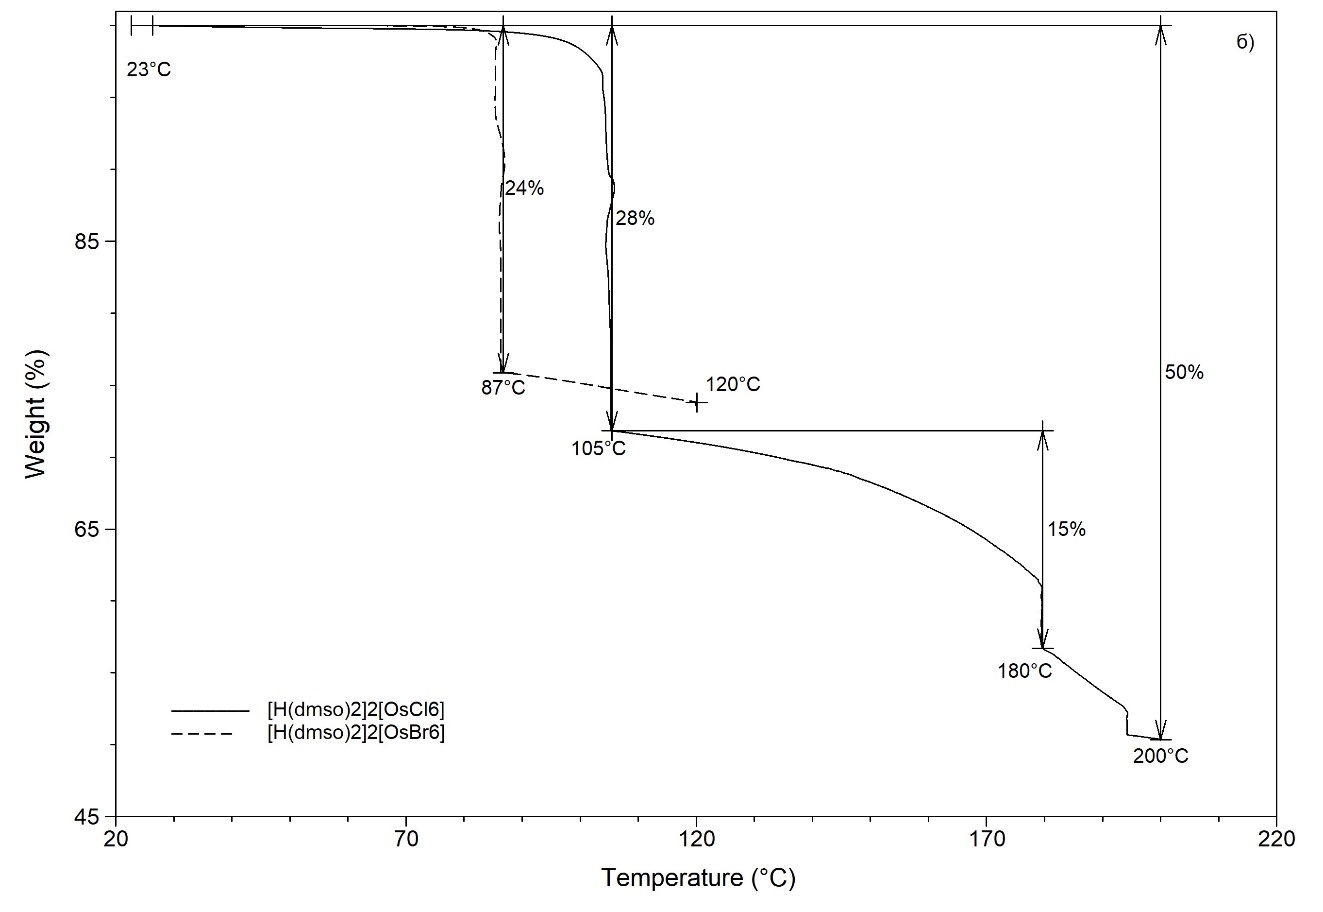


b

**Fig. S2.** DTA/TG results of [H(dmso)2]2[OsХ6], where Х = Cl, Br: DTA and Temperature curves vs. time (a); temperature dependences of TG curves (b).

**
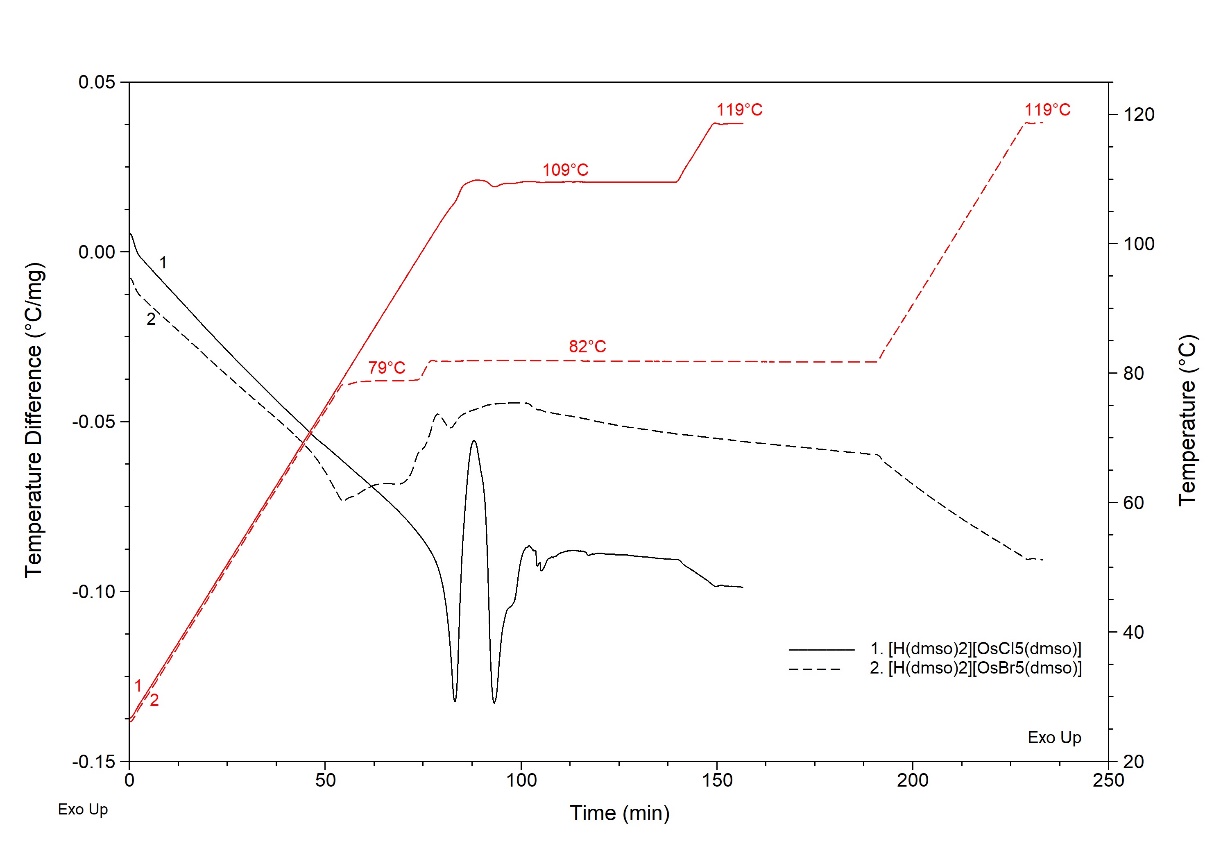
**

a


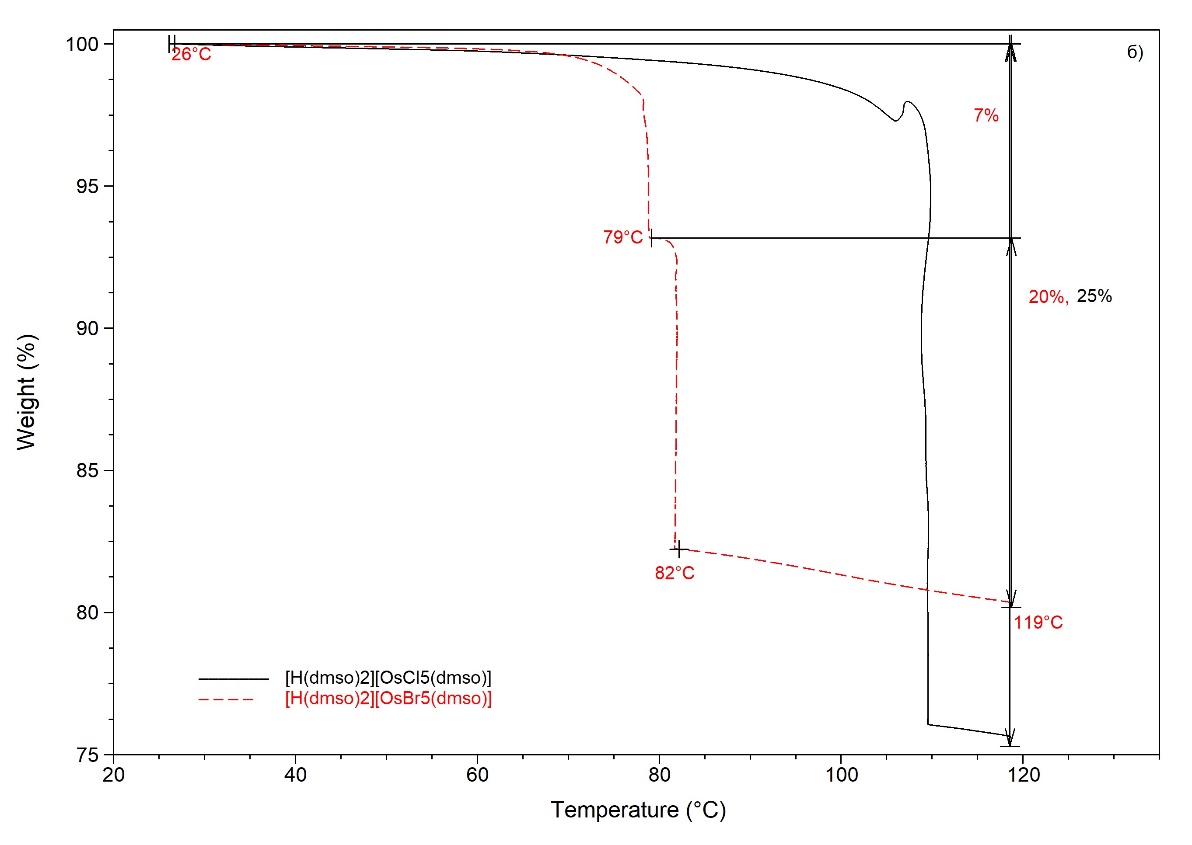


b

**Fig. S3.** DTA/TG results of [H(dmso)2][OsХ5(dmso)], where Х = Cl, Br: time dependences of DTA and Temperature curves (a); TG curves vs. time (b).

I

2θ, deg.

1

3

2

**Fig. S4**. X-ray diffraction patterns of [OsCl4(dms)2]: experimental diffraction pattern of [OsCl4(dms)2] powder (1); simulated for a single crystal with space group *P*bca (2) and space group *P*21/n (3).

*Quantum-chemical calculations*

The electronic structure of the molecules was calculated by the density functional theory (DFT) method using the hybrid functional B3LYP and the basis set def2-SV(P). Full optimization of the geometry of the calculated molecules was carried out. All calculations were performed using the Firefly 8.20 software package.

[A. A. Granovsky, Firefly version 8.20. http://classic.chem.msu.su/gran/firefly/index.html]


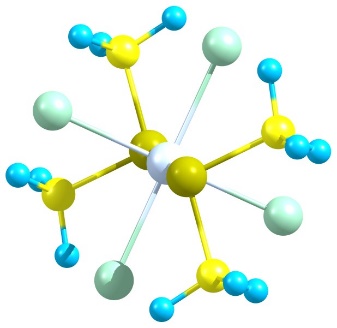

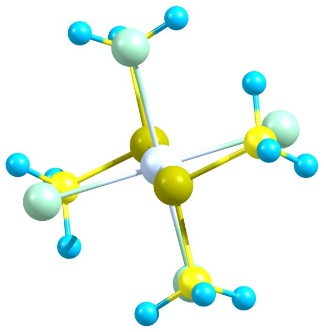

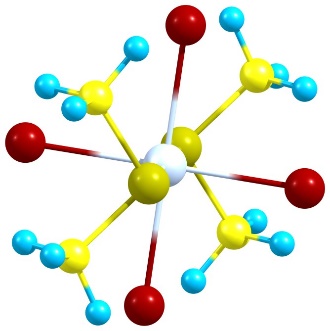

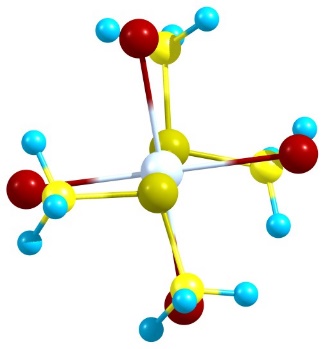


**5** *staggered* (0) **5** *eclipsed* (+11.4) **6** *staggered* (0) **6** *eclipsed* (+5.6)

**Fig. S5.** The staggered and eclipsed conformers of molecules **5** and **6** according to DFT calculations. The relative energies of the conformers (kJ/mol) are given in brackets.
